# Supplementary material for: Attitudes and Intentions toward COVID-19 Vaccination among Spanish Adults: A Descriptive Cross-Sectional Study
Source: MDPI journal article supplement (doi:10.3390/vaccines9101135), 2021-10-04
Supplement: s1 [file s1]

El trabajador **Maite Matalobos Luis** ha colaborado de manera desinteresada para que la recogida de datos del estudio titulado " Attitudes and Intentions toward COVID-19 Vaccination Among Spanish Adults: A Descriptive Cross-Sectional Study" pudiera llevarse a cabo.

Para que así conste:

Fdo. Maite Matalobos Luis

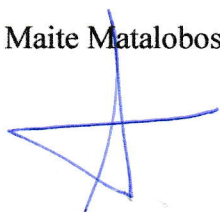A handwritten signature in blue ink, consisting of several overlapping loops and a long horizontal stroke extending to the right.

Santiago de Compostela, 2 de octubre de 2021
