# Supplementary material for: Attitudes and Intentions toward COVID-19 Vaccination among Spanish Adults: A Descriptive Cross-Sectional Study
Source: MDPI journal article supplement (doi:10.3390/vaccines9101135), 2021-10-04
Supplement: s1 [file s1]

El trabajador **Beatriz Requeijo Villaverde** ha colaborado de manera desinteresada para que la recogida de datos del estudio titulado " Attitudes and Intentions toward COVID-19 Vaccination Among Spanish Adults: A Descriptive Cross-Sectional Study" pudiera llevarse a cabo.

Para que así conste:

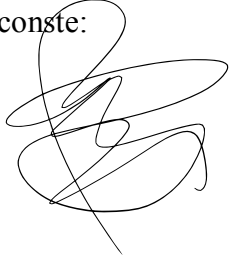A handwritten signature in black ink, consisting of several loops and a long horizontal stroke at the bottom.

Fdo. Beatriz Requeijo Villaverde

Santiago de Compostela, 2 de octubre de 2021
